# Supplementary material
Source: PubMed Central journal article supplement (PMC3801433)

## Supplementary Figure 1

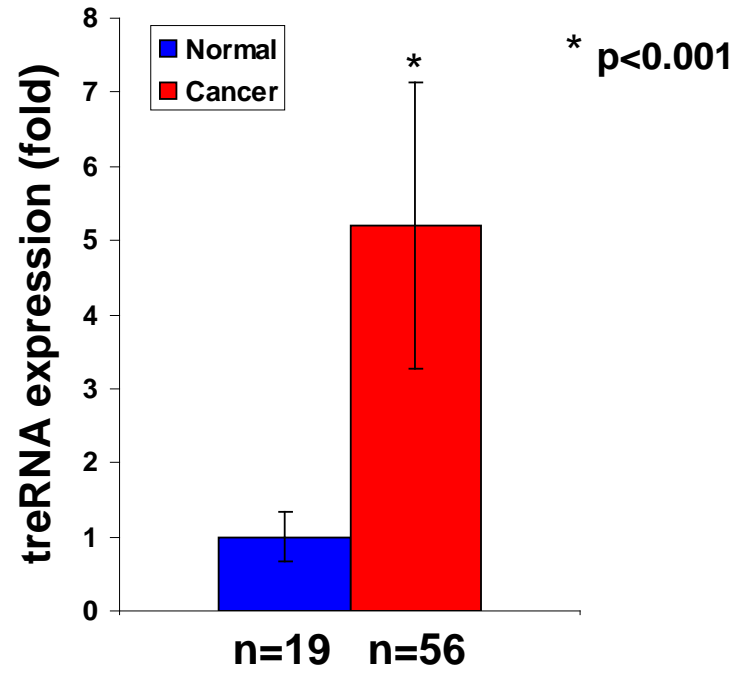

## Supplementary Figure 2

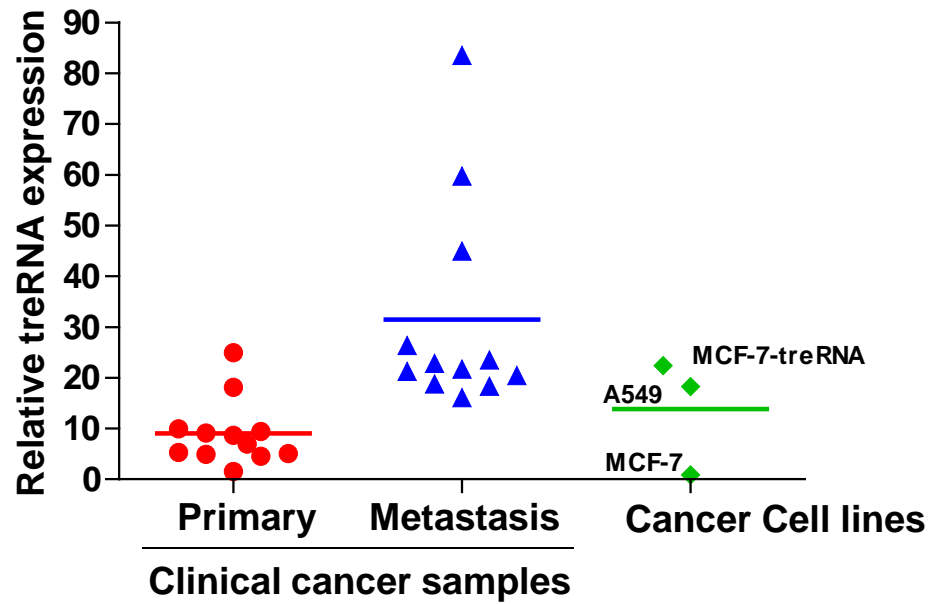

## Supplementary Figure 3

MCF7 cells

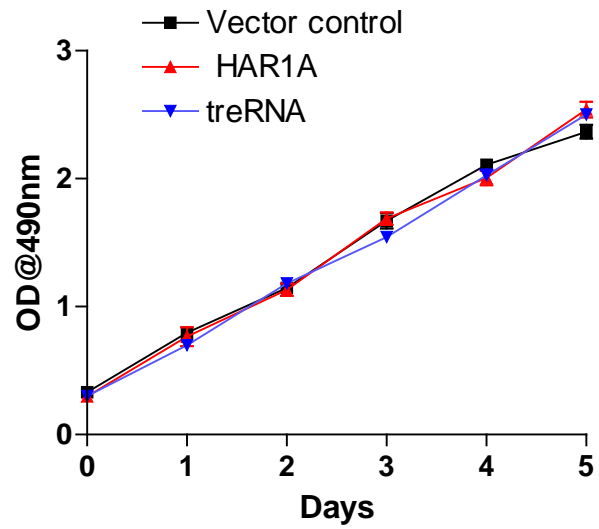

## Supplementary Figure 4

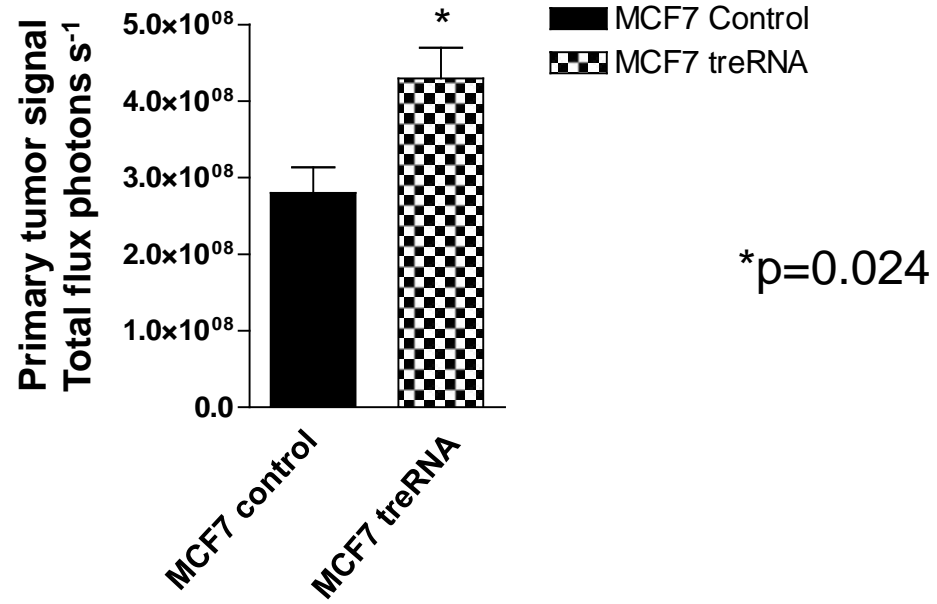

## Supplementary Figure 5

A549 cells

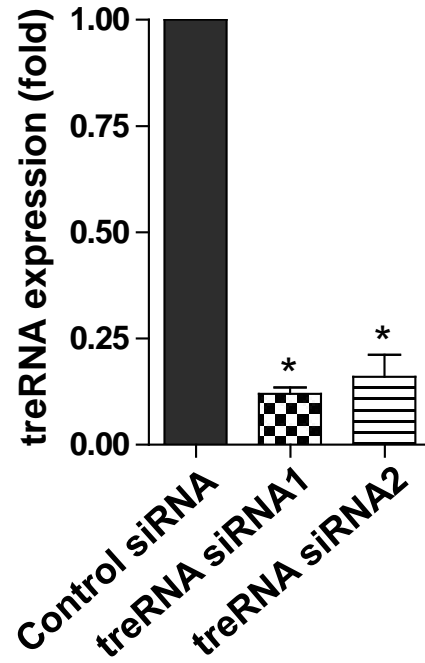

\*p=0.0001

## Supplementary Figure 6

A549 cells

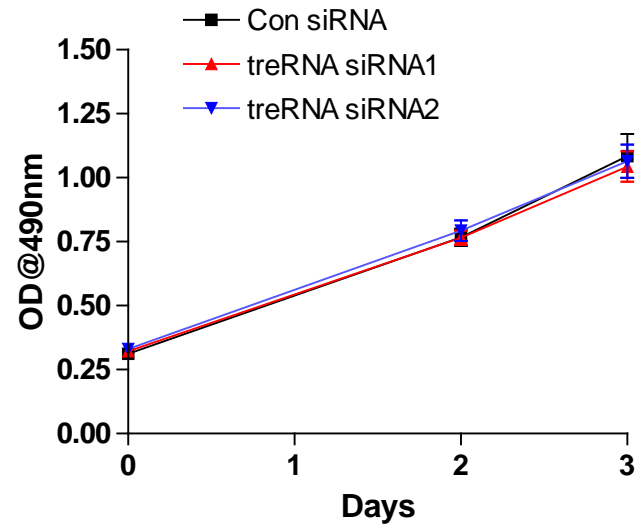

# Supplementary Figure 7

## A549 cells

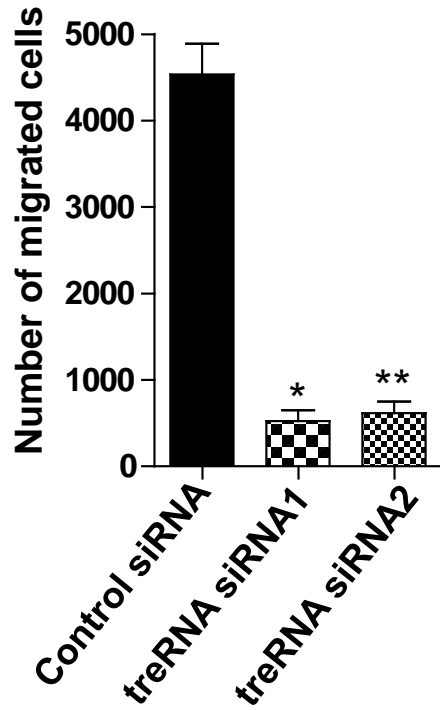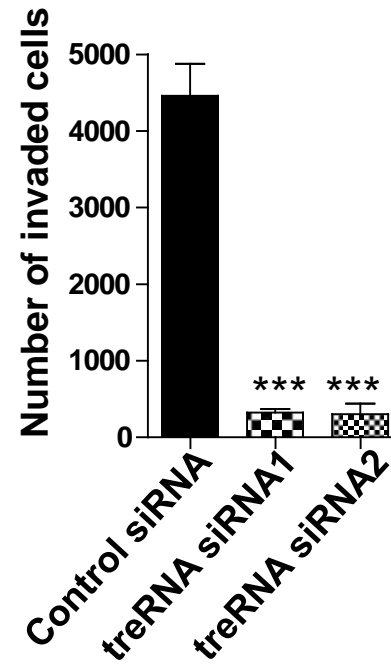

\* $p=0.0004$

\*\* $p=0.0005$

\*\*\* $p<0.0001$

## Supplementary Figure 8

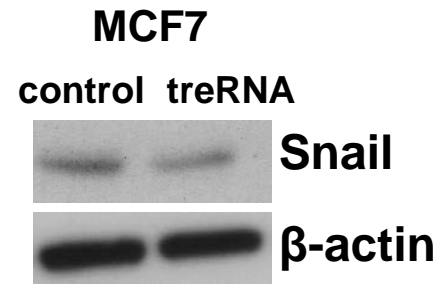



## Supplementary Figure 9

A549 cells

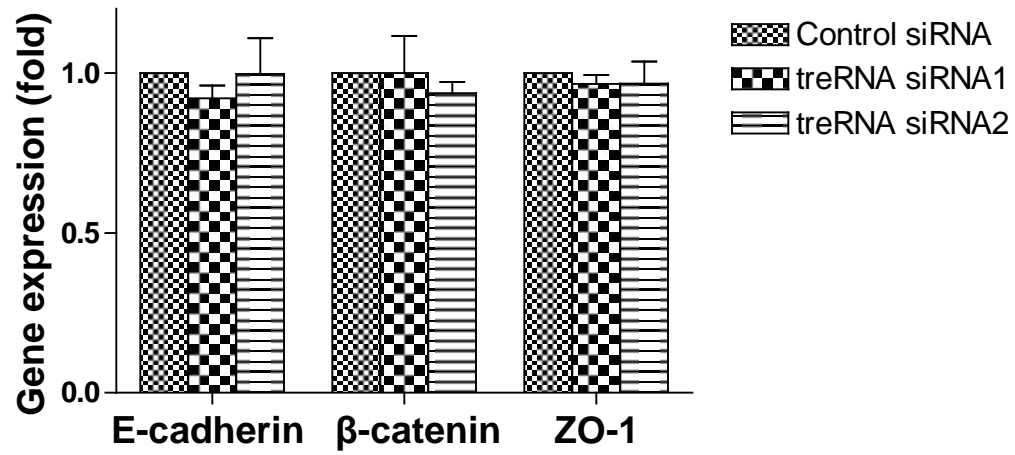

## Supplementary Figure 10

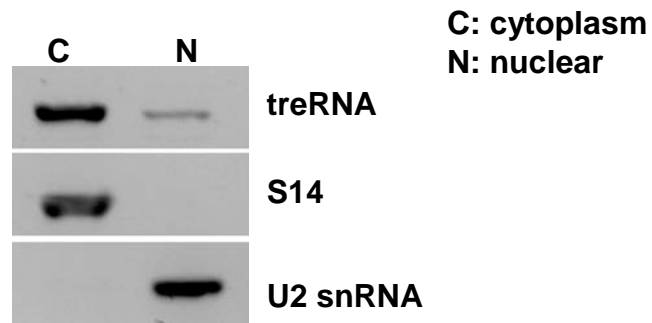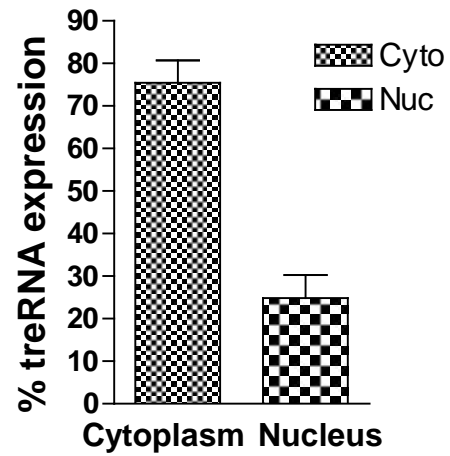

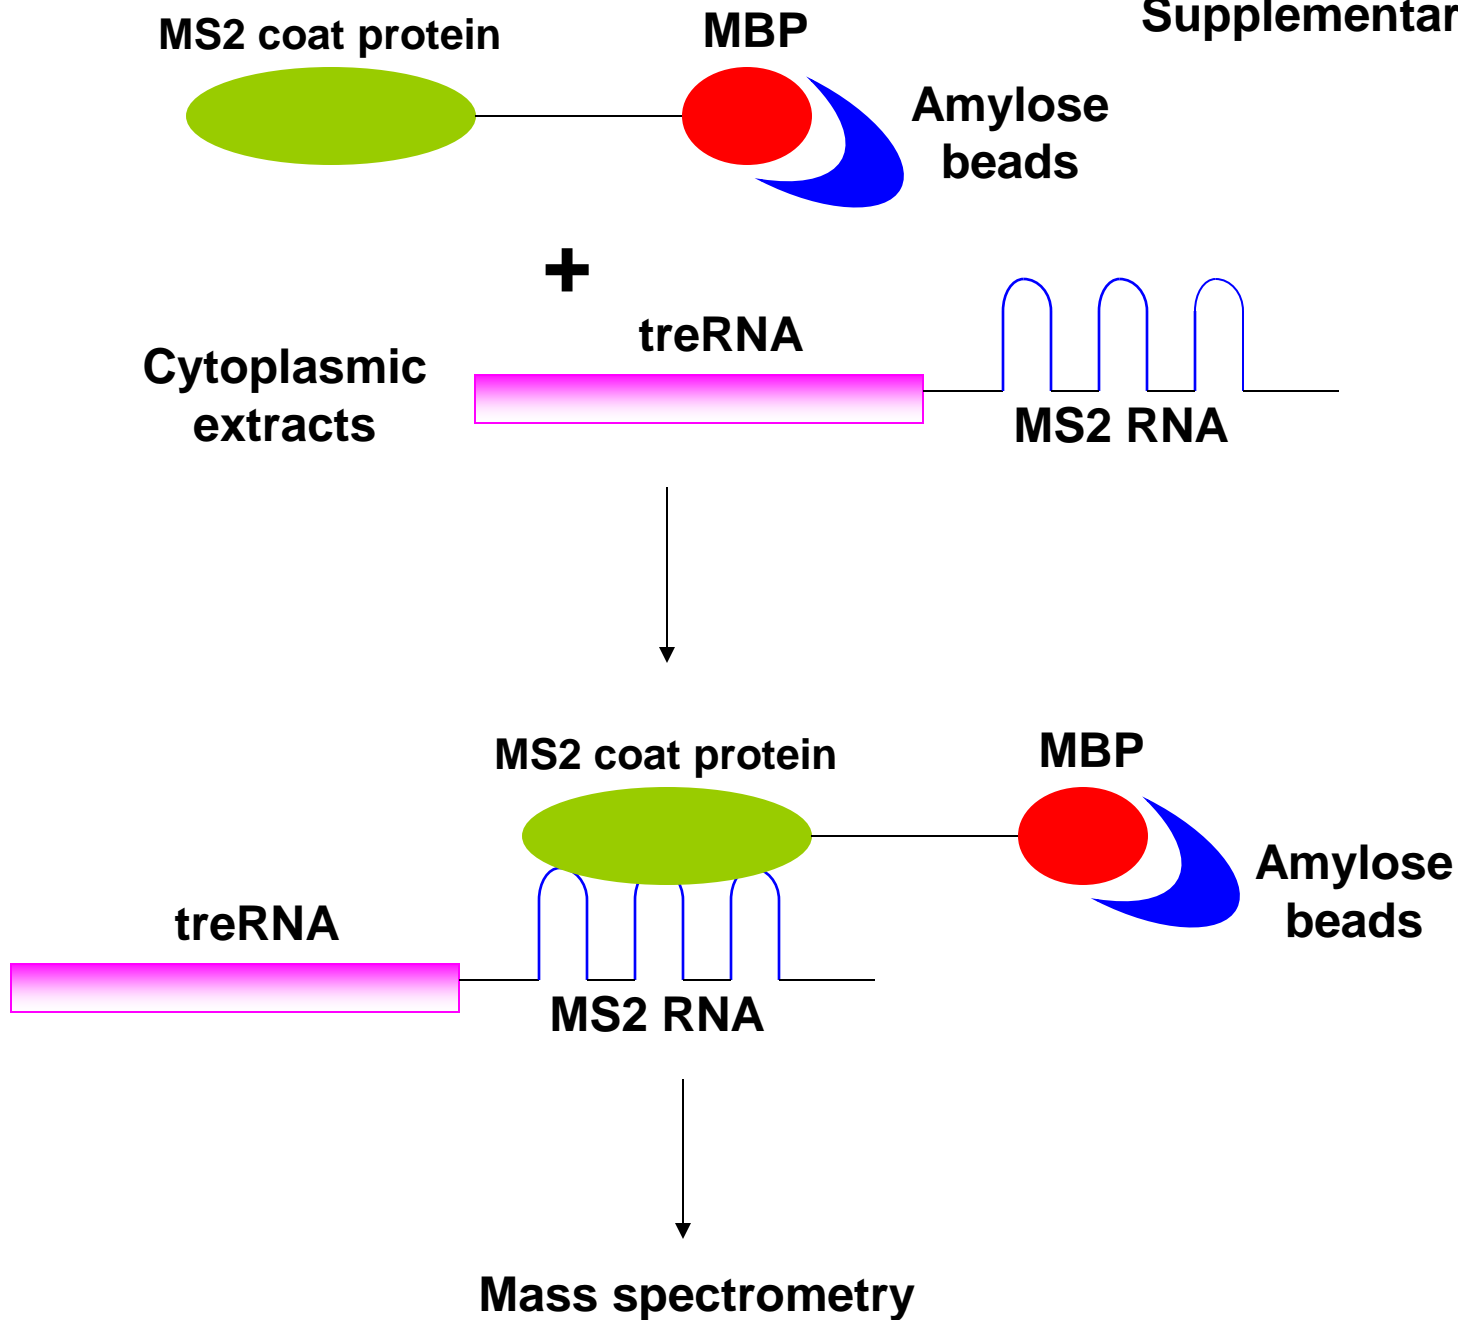

## Supplementary Figure 12

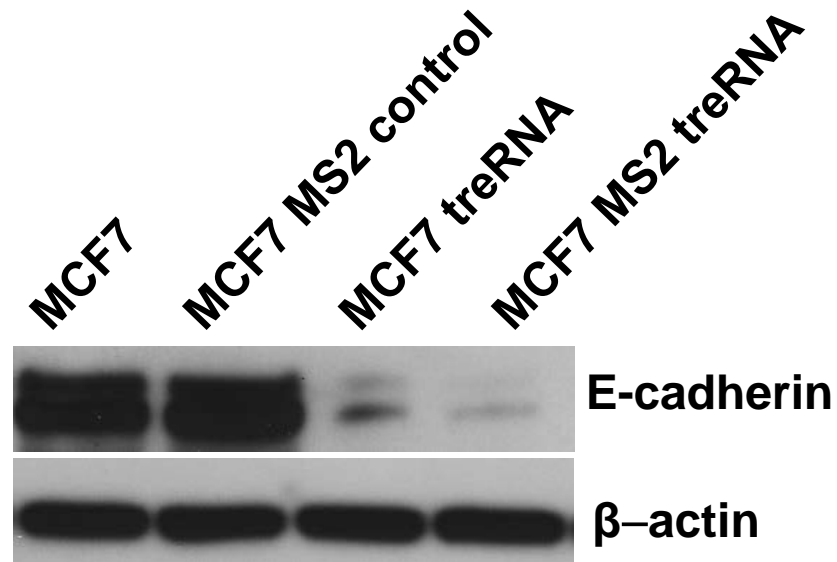

**MCF7 cells**

**Supplementary Figure 13**

*control*

*treRNA*

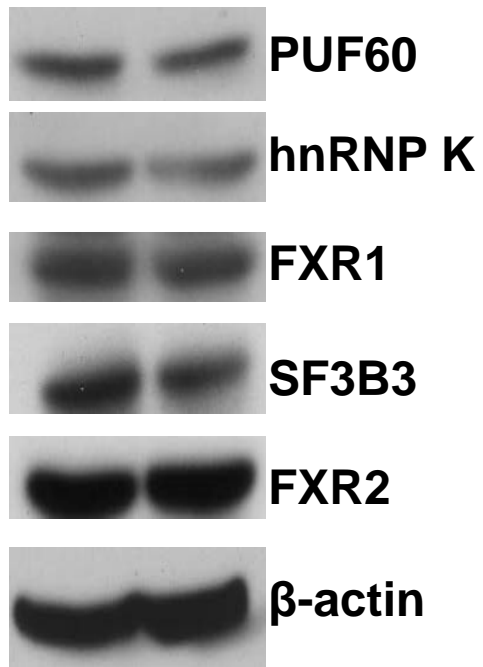

MCF7-treRNA cells

Supplementary Figure 14

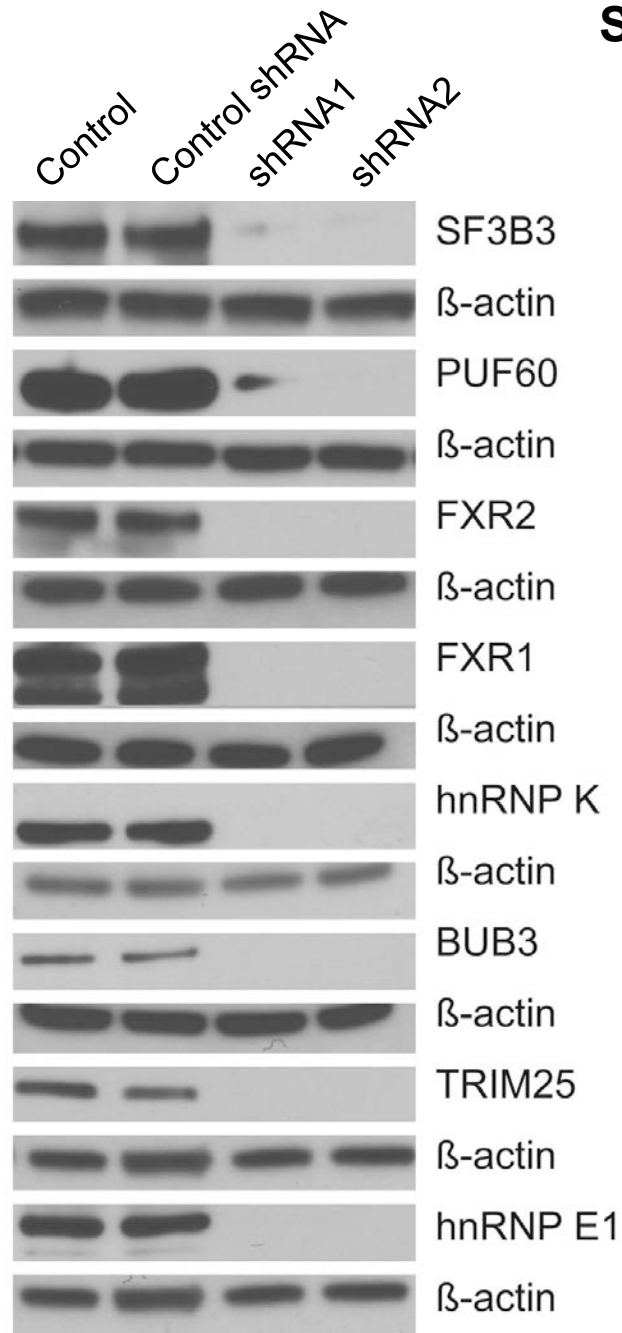

## Supplementary Figure 15

MCF7-luc cells

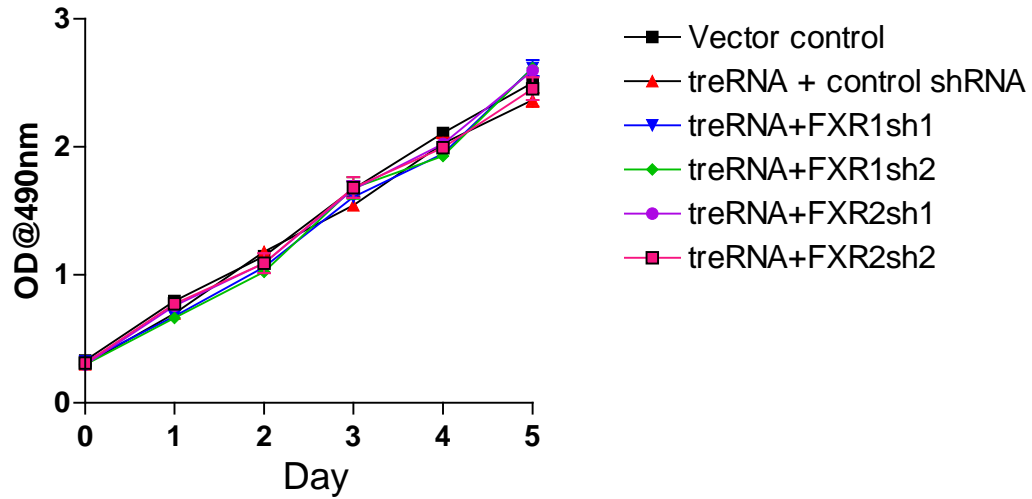

# Supplementary Figure 16

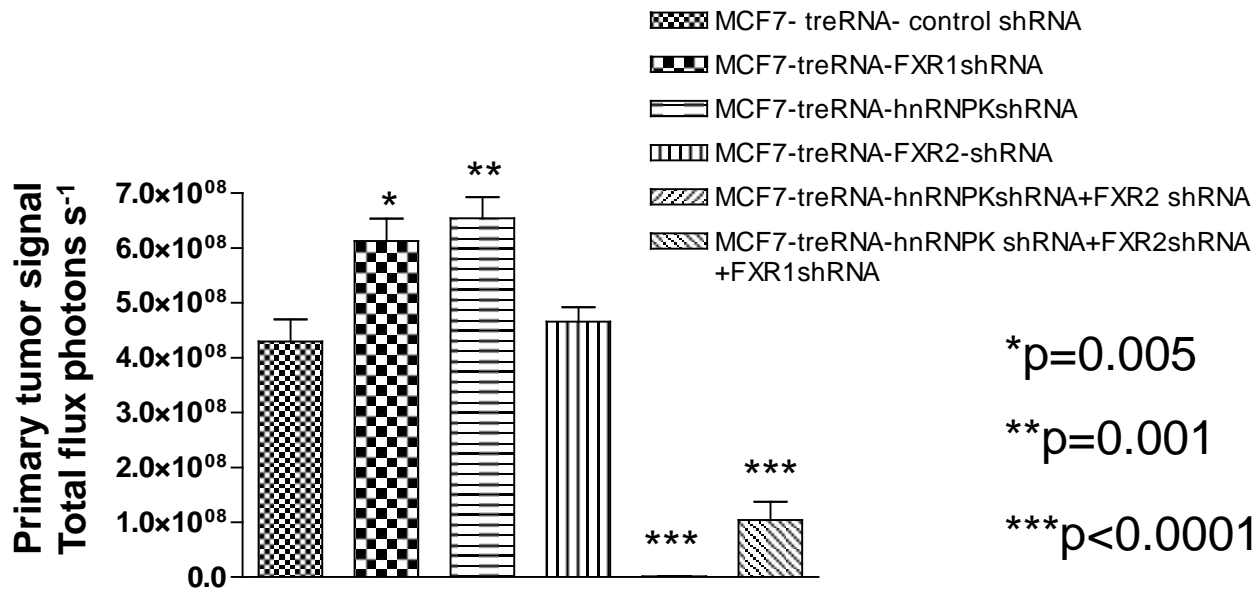



## Supplementary Figure 17

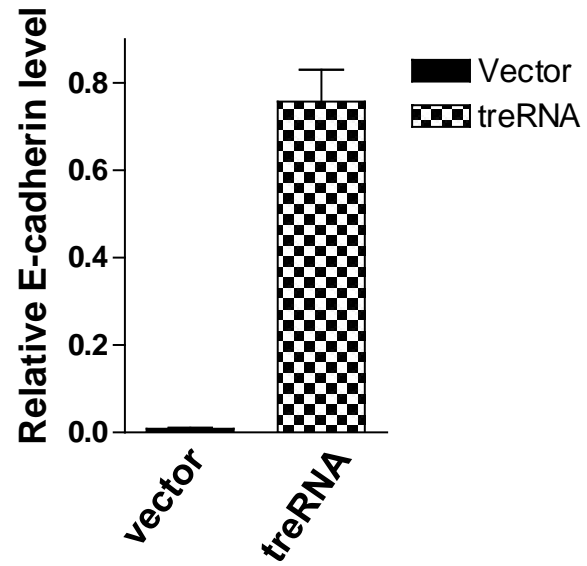

Supplement: emboj2013188s1.pdf [file emboj2013188s1.pdf]
