# Supplementary material
Source: PubMed Central journal article supplement (PMC3801433)

Figure 3A

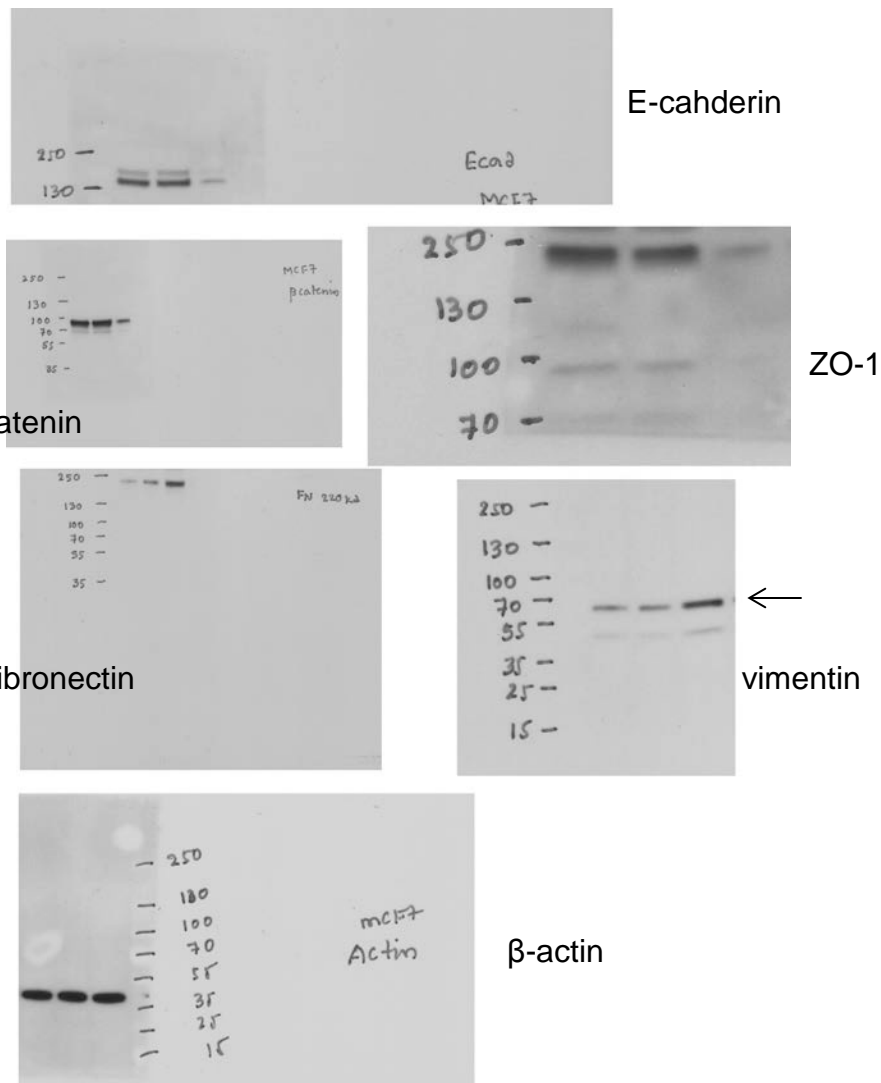

Figure 3B

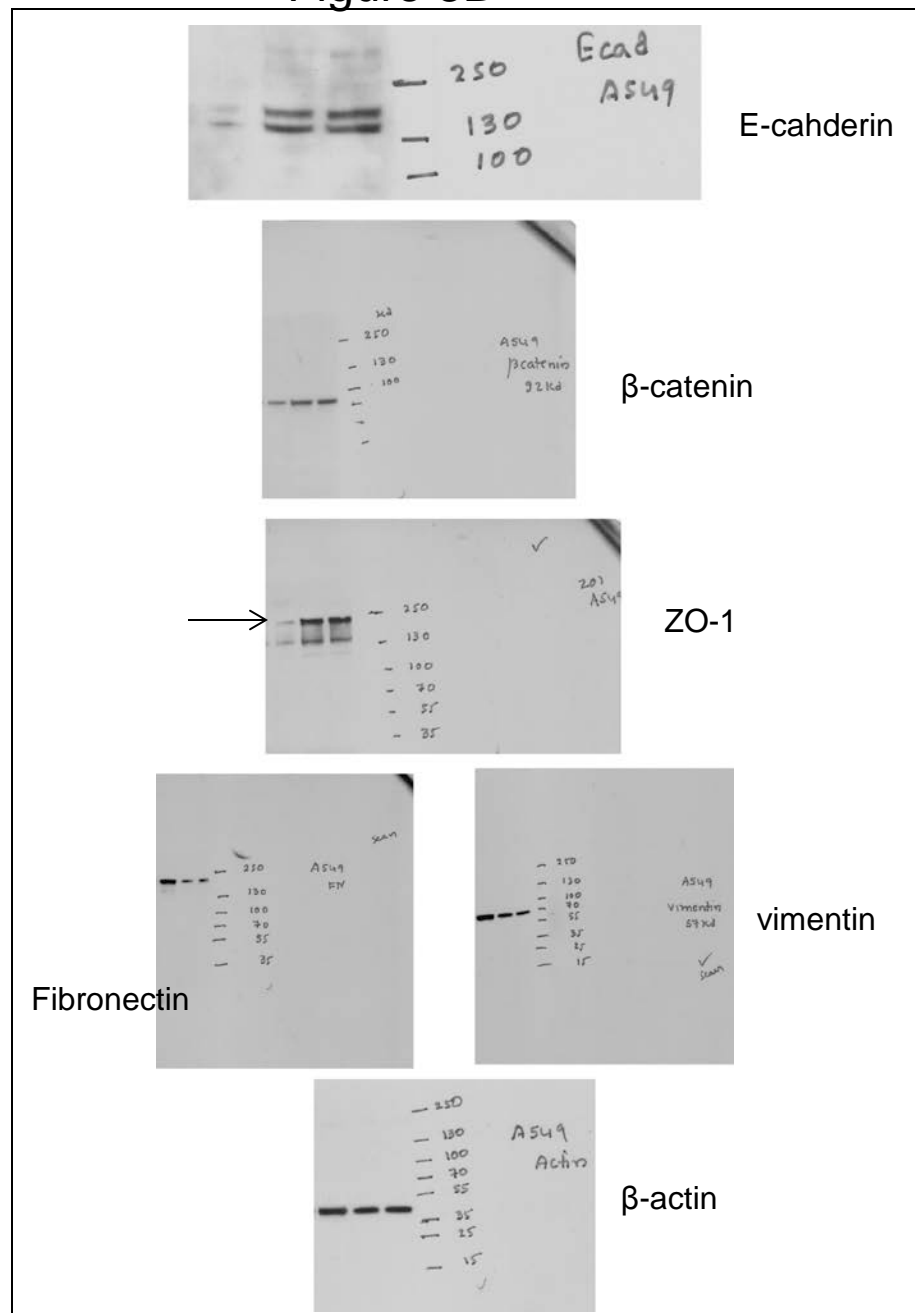

Supplement: emboj2013188df3.pdf [file emboj2013188df3.pdf]

Figure 4B

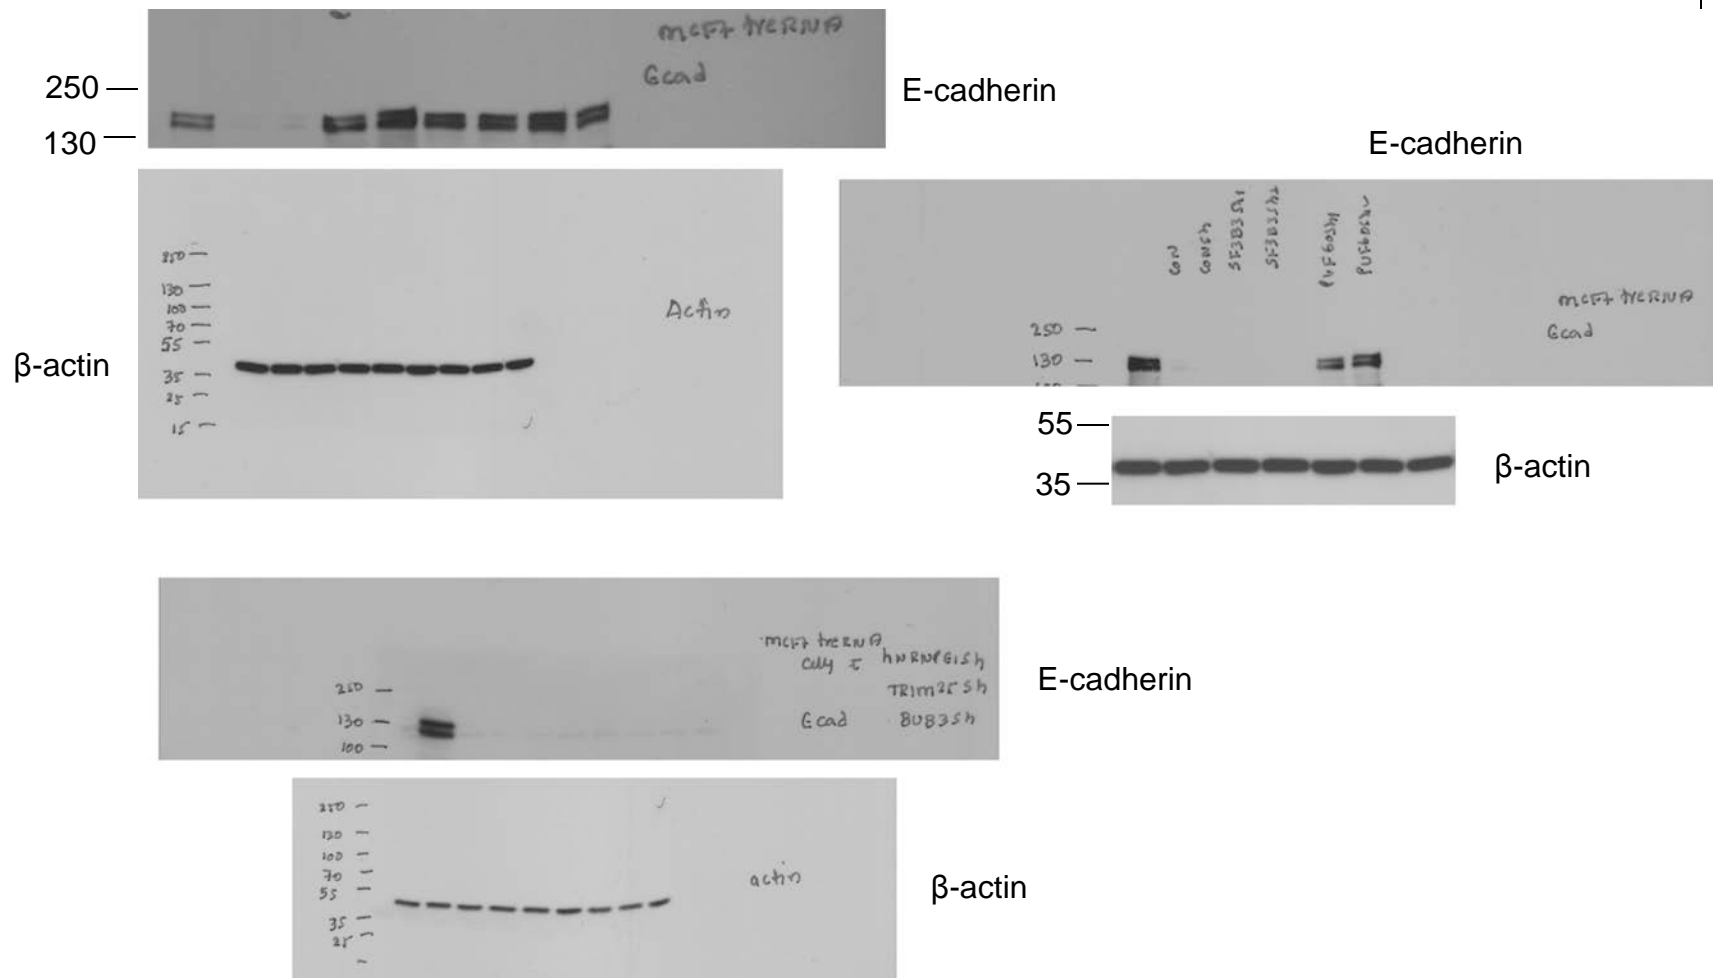

Figure 4C

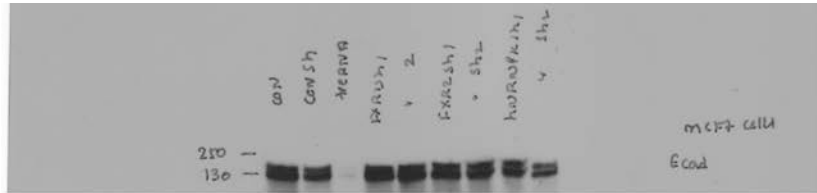

E-cadherin

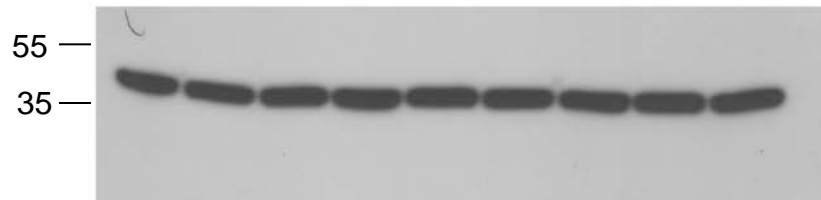

β-actin

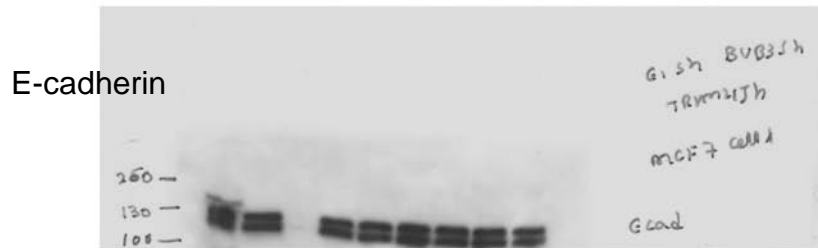

E-cadherin

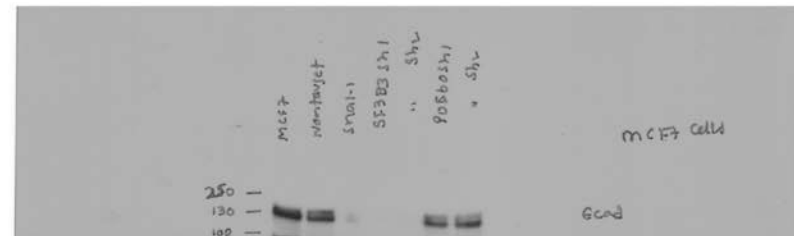

E-cadherin

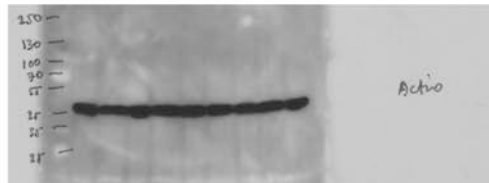

β-actin

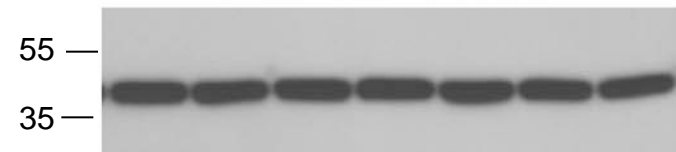

β-actin

Supplement: emboj2013188df4.pdf [file emboj2013188df4.pdf]

Figure 5A

SF3B3

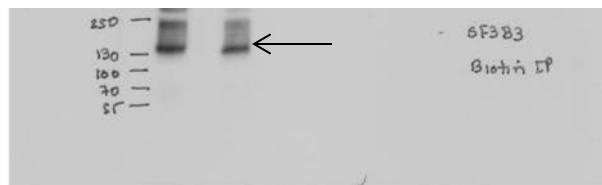

PUF60

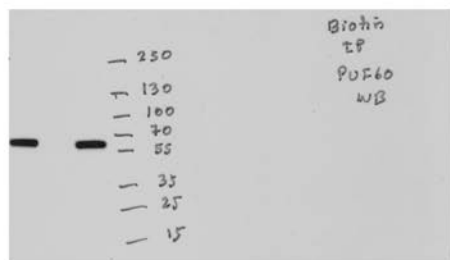

hnRNPK

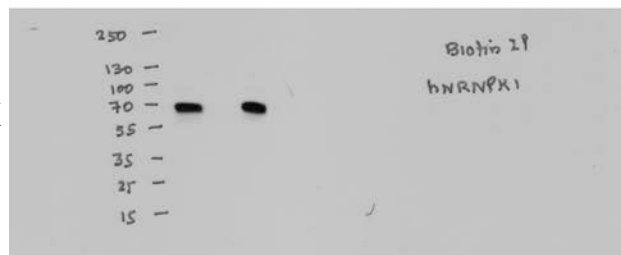

FXR1

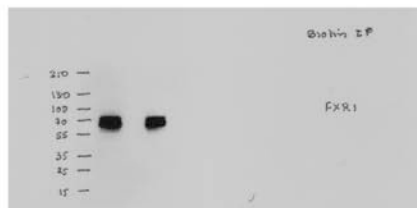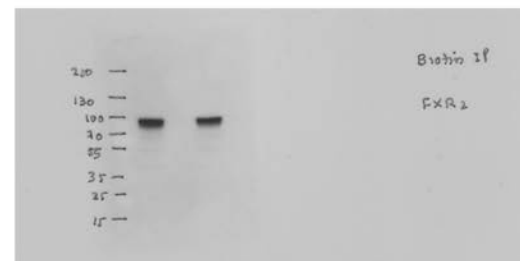

FXR2

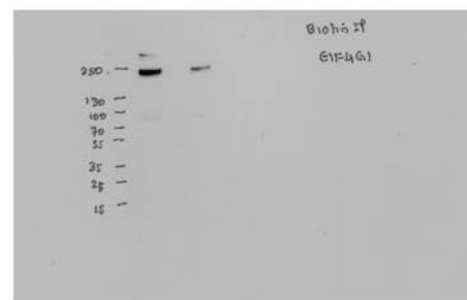

eIF4G1

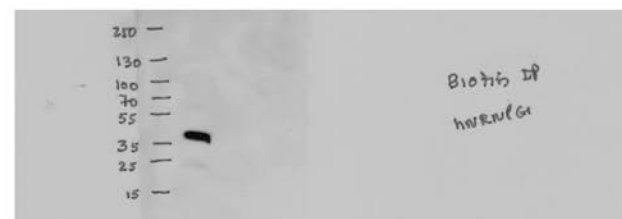

hnRNPE

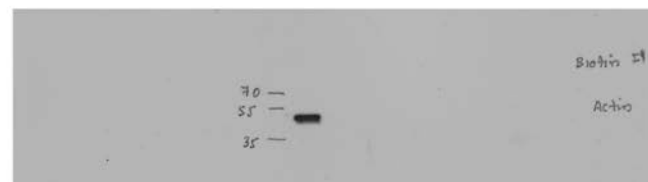

$\beta$ -actin

Figure 5B

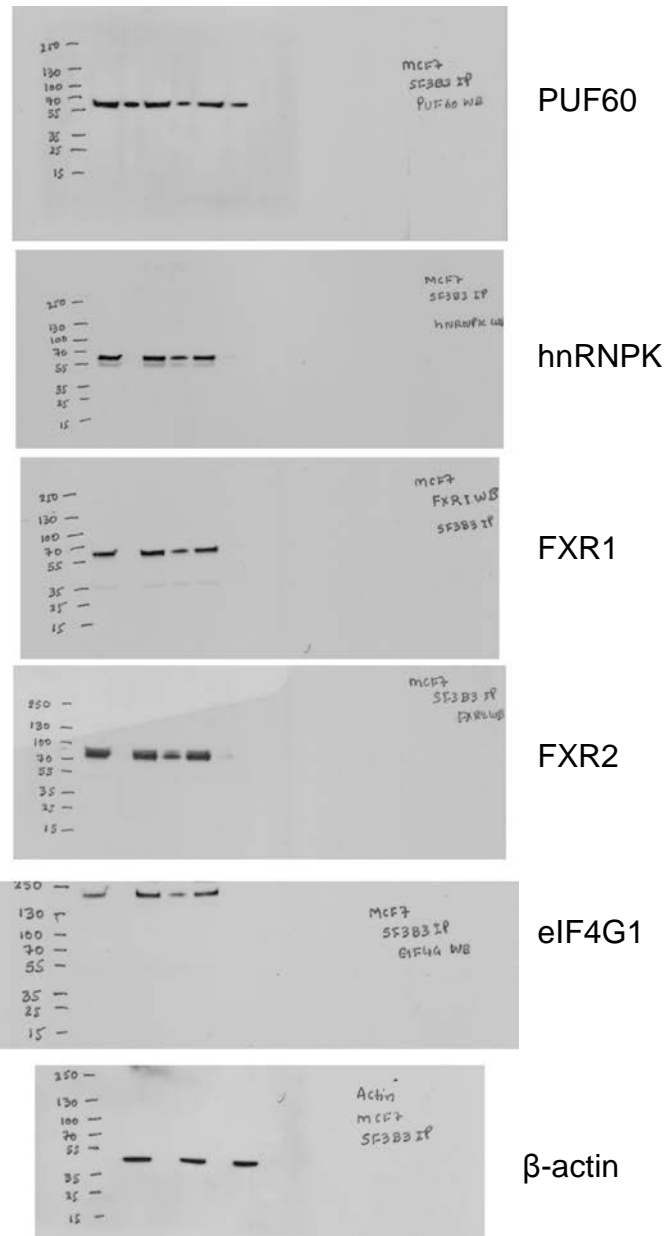

Figure 5C

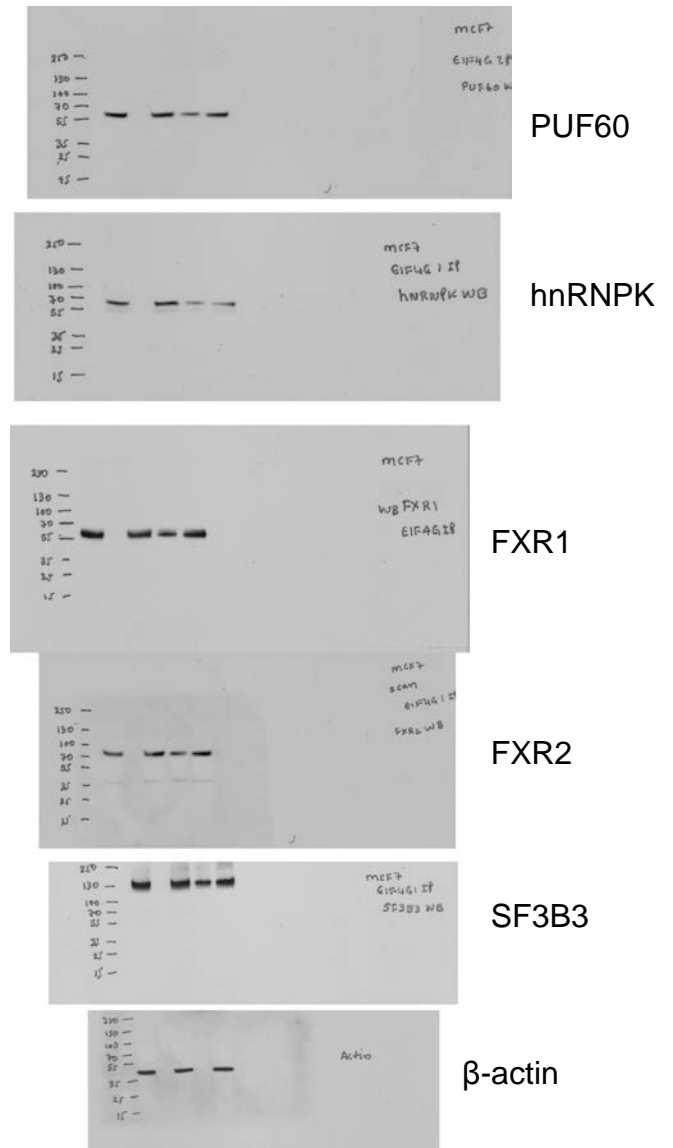

Figure 5D

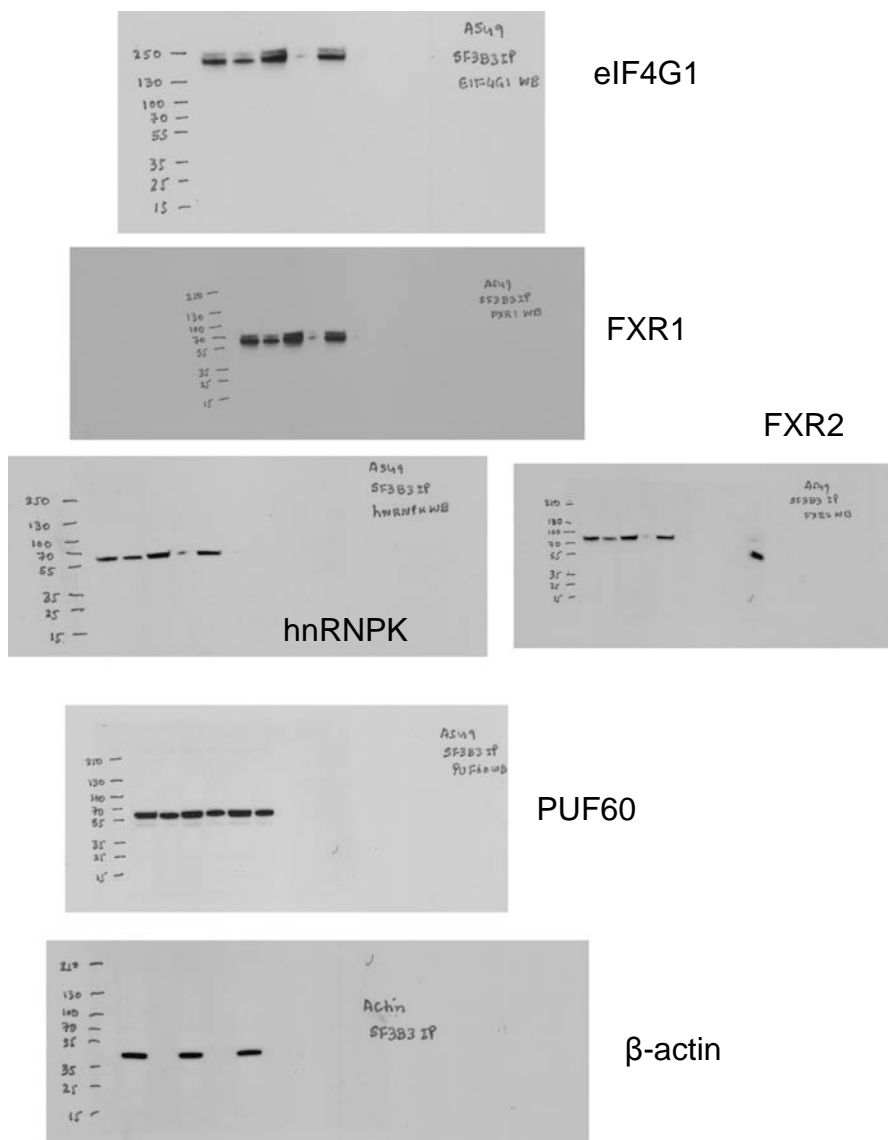

Figure 5E

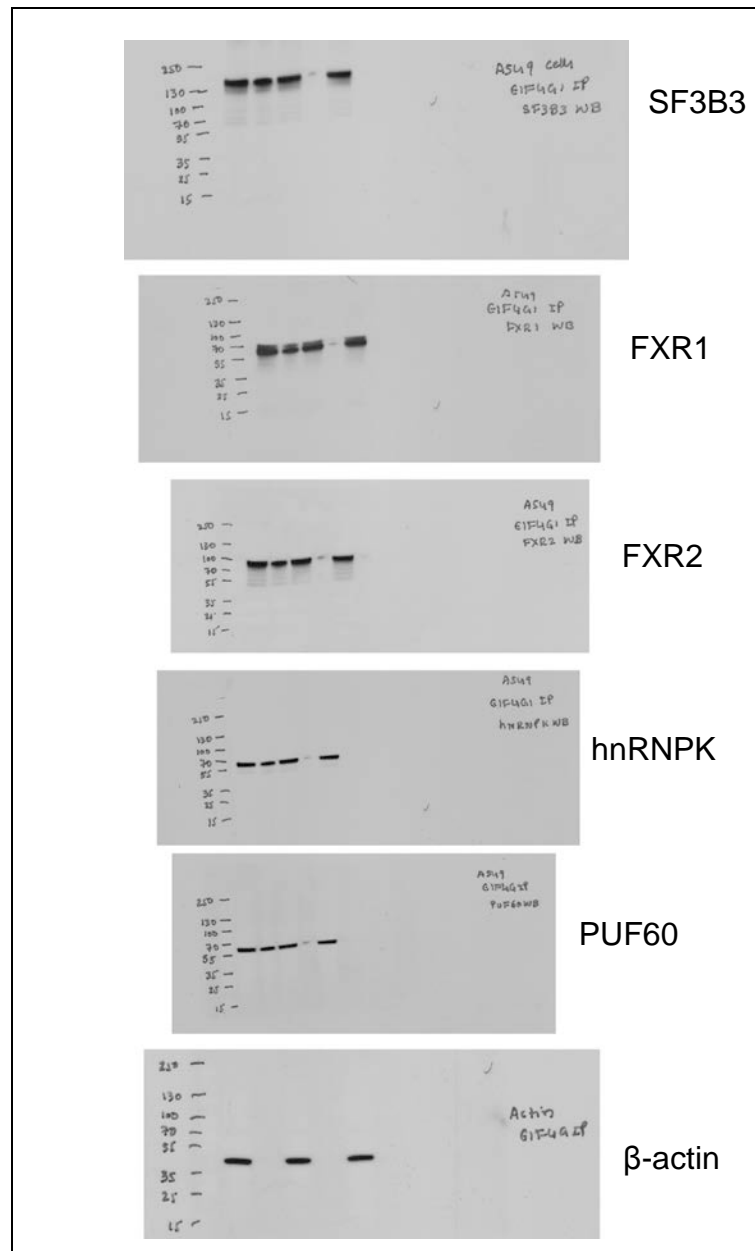

Supplement: emboj2013188df5.pdf [file emboj2013188df5.pdf]
